# Supplementary material
Source: PubMed Central journal article supplement (PMC1450176)

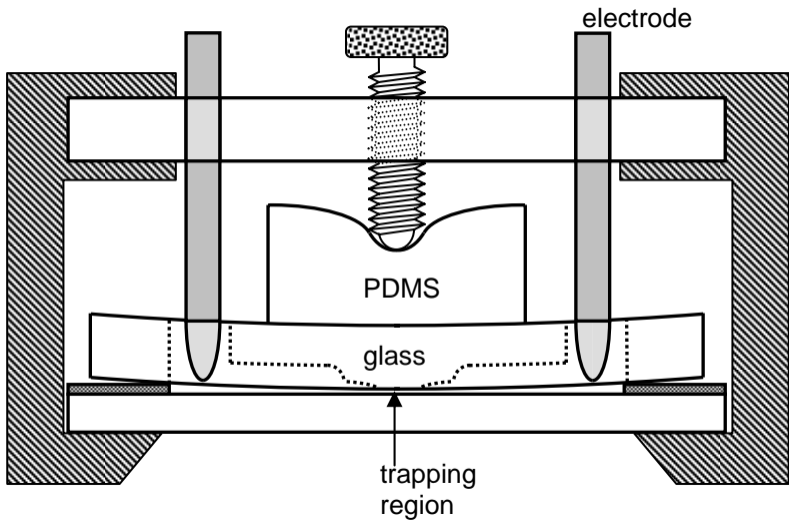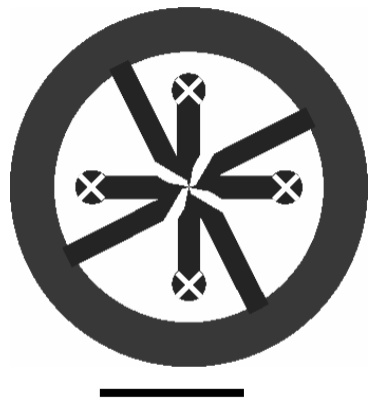

B)

Supplement: pnas_0509976103_1.pdf [file pnas_0509976103_1.pdf]

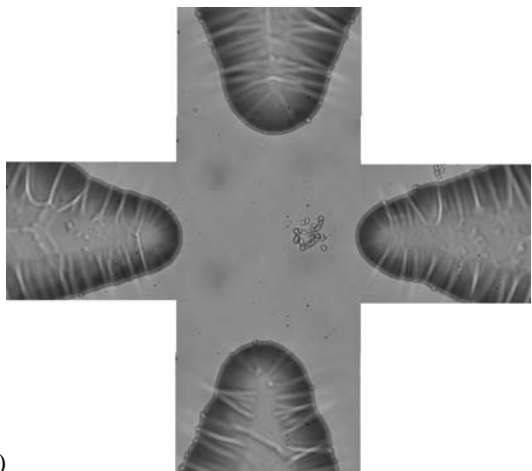

A)

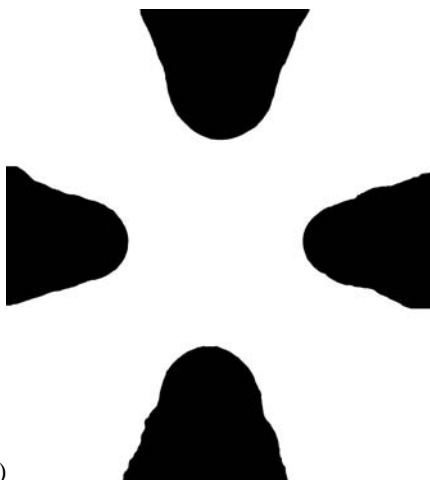

B)

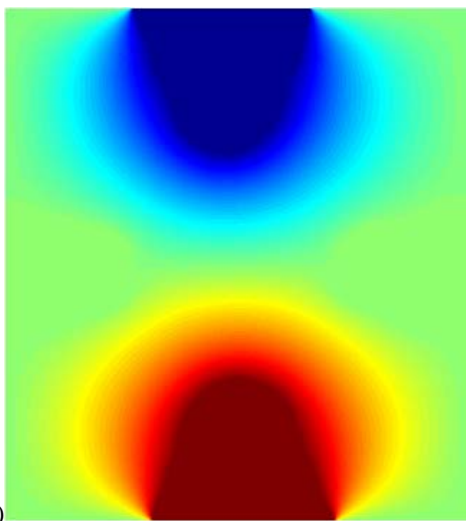

C)

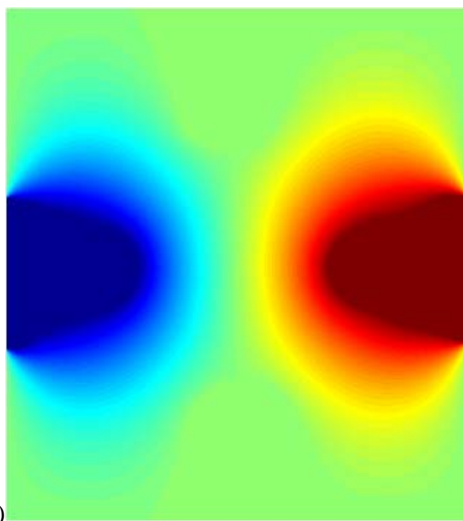

D)

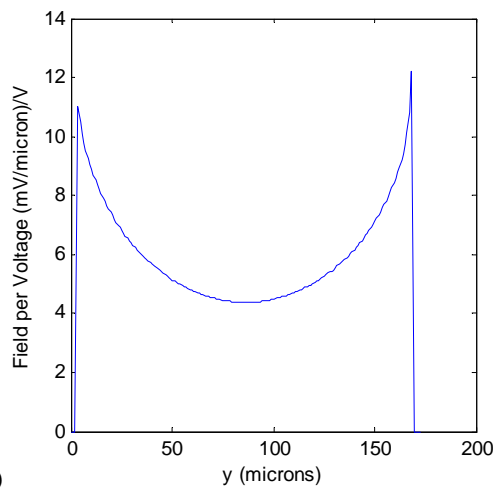

E)

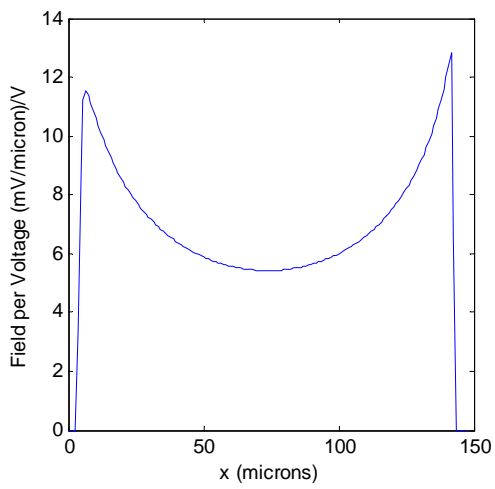

F)

Supplement: pnas_0509976103_2.pdf [file pnas_0509976103_2.pdf]
